# Supplementary material for: Whistling is metabolically cheap for communicating bottlenose dolphins (Tursiops truncatus)
Source: Oxford University Press journal article supplement (doi:10.1242/jeb.212498), 2019-01-01
Supplement: jeb212498supp.pdf [file jeb212498supp.pdf]

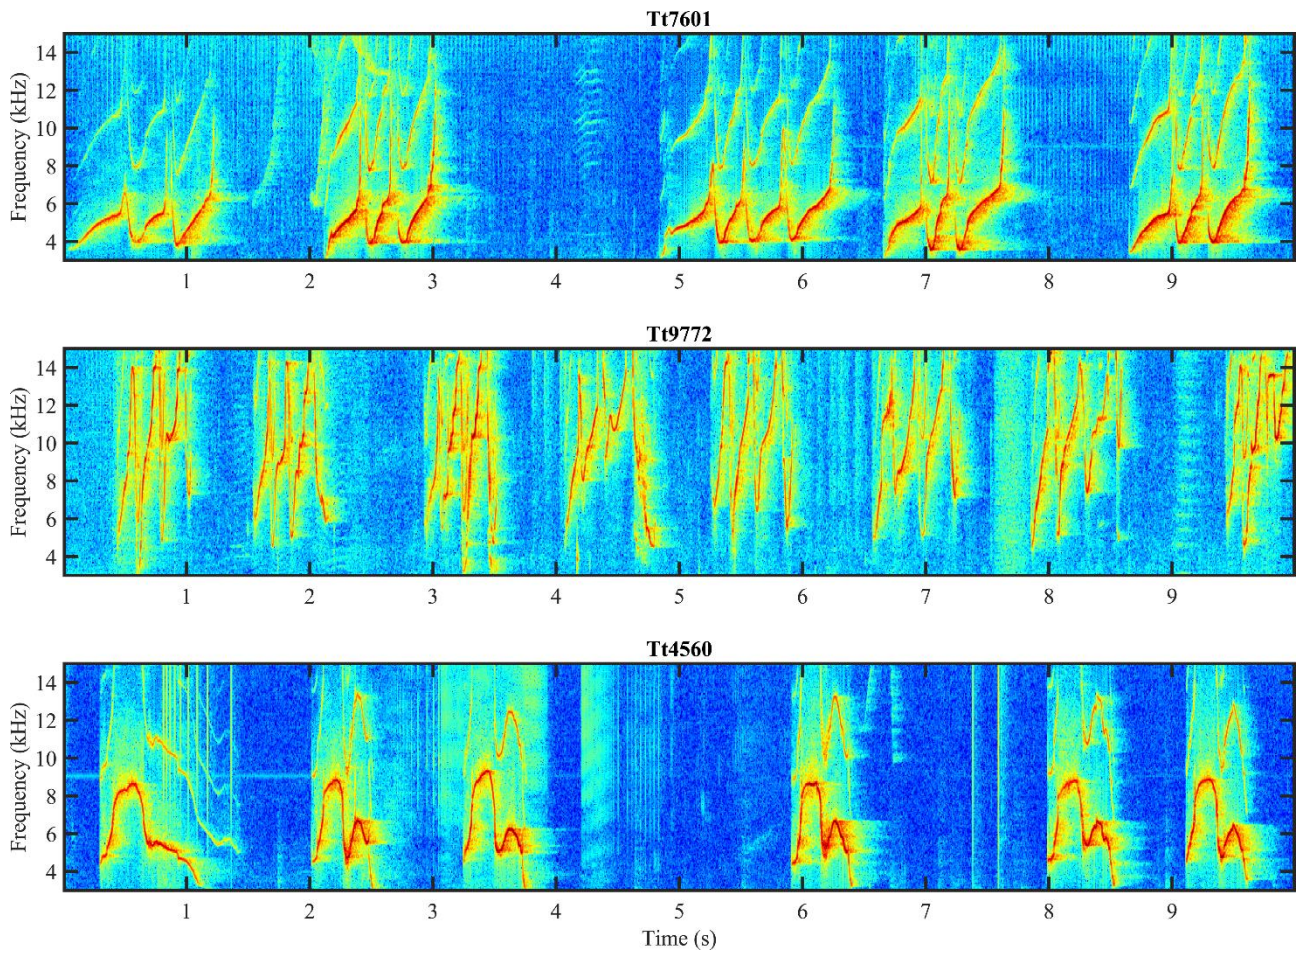

**Figure S1 – Example spectrograms of whistles from the three study animals.** Each dolphin produced whistles with unique frequency modulation pattern. The whistles are highly stereotyped, and the fundamental contour was used as part of the validation process for inclusion in the study. Spectrogram settings FFT size 1024, 95% overlap.
